# Supplementary material for: Metabarcoding analysis of eukaryotic microbiota in the gut of HIV-infected patients
Source: PLoS One. 2018 Jan 31;13(1):e0191913. doi: 10.1371/journal.pone.0191913 (PMC5791994; doi:10.1371/journal.pone.0191913)
Supplement: S7 Table — (XLSX) [file pone.0191913.s013.xlsx]

## Sheet: Feuil1
S7 Table: List of fungal OTUs and No. of reads obtained from the amplification of ITS1 and ITS2 regions in the fecal samples of HIV-infected patients and healthy subjects.
ITS 1
Taxa	OTU	SH code	DOI code	P1	P2	P3	P4	P5	P6	P7	P8	P9	P10	P11	P12	P13	P14	P15	P16	P17	P18	P19	P20	P21	P22	P23	P24	P25	P26	P27	P28	P29	P30	P31	C1	C2	C3	C4	C5	C6	C7	C8	C9	C10	C11	C12
a	OTU 17 Alternaria	SH216784.07FU	dx.doi.org/10.15156/BIO/SH216784.07FU	0	0	0	0	183	0	0	0	0	0	0	0	0	0	79	0	0	0	0	0	0	0	0	0	0	0	0	0	0	0	0	0	785	0	0	0	0	0	0	0	700	77	0
a	OTU 26 Alternaria	SH215493.07FU	dx.doi.org/10.15156/BIO/SH215493.07FU	0	0	0	0	0	0	0	0	379	0	0	0	0	0	0	0	0	0	0	0	0	0	0	0	0	0	0	0	0	0	0	0	0	0	99	528	0	80	0	0	0	0	0
a	OTU 18 Alternaria	SH216785.07FU	dx.doi.org/10.15156/BIO/SH216785.07FU	0	0	0	0	0	0	0	0	0	0	0	0	0	0	0	0	0	0	0	18	38	0	0	0	0	0	0	0	0	0	0	45	580	0	0	0	0	0	0	0	0	45	0
a	OTU 5 Ascomycota	SH533035.07FU	dx.doi.org/10.15156/BIO/SH533035.07FU	0	0	0	0	0	0	0	0	0	0	0	0	0	0	0	0	0	0	0	0	0	48	0	0	6	0	0	0	0	0	0	0	0	0	0	579	810	0	0	150	0	360	0
a	OTU 11 Aspergillus	SH186265.07FU	dx.doi.org/10.15156/BIO/SH186265.07FU	0	0	0	0	0	0	9	0	0	0	0	0	0	0	0	0	0	0	0	0	0	0	0	0	0	0	0	0	0	0	0	0	79	0	0	0	0	0	0	0	0	0	0
a	OTU 3 Aspergillus penicillioides	SH198028.07FU	dx.doi.org/10.15156/BIO/SH198028.07FU	84	0	0	0	3	0	0	0	0	0	0	0	0	0	0	3	0	0	0	0	0	0	0	0	0	0	0	0	0	0	0	23	0	0	0	0	0	0	0	0	0	0	0
a	OTU 14 Caloplaca austrocitrina	SH193410.07FU	dx.doi.org/10.15156/BIO/SH193410.07FU	0	0	0	5	0	0	0	0	0	0	0	0	46	0	0	3	0	0	0	8	85	0	0	0	0	0	0	0	0	0	0	0	0	0	0	0	0	0	0	0	0	0	0
a	OTU 22 Candida metapsilosis	SH180865.07FU	dx.doi.org/10.15156/BIO/SH180865.07FU	0	2	5	3	0	15	25	9	0	0	0	0	0	4	37	0	0	0	0	0	0	0	0	0	0	0	0	0	0	0	0	22	35	0	290	66	0	0	0	46	0	0	0
a	OTU 23 Candida albicans	Not avaliable	Not avaliable	0	49	36	0	0	0	0	57	0	0	0	0	0	58	48	4	0	0	0	0	0	0	0	0	0	0	0	0	0	0	0	0	147	4	50	0	86	0	0	49	0	0	1139
a	OTU 21 Candida albicans	Not avaliable	Not avaliable	0	4178	3572	1450	3644	1893	2006	863	0	0	0	0	5	4419	5267	7800	0	0	0	0	0	2337	124	0	204	31	58	2489	6806	137	40	2679	66	0	1210	50	0	65	0	29	0	0	1090
a	OTU 1 Candida dubliniensis	SH194548.07FU	dx.doi.org/10.15156/BIO/SH194548.07FU	0	0	0	0	0	0	0	0	0	0	0	0	0	0	0	0	0	0	0	0	0	0	0	0	0	0	0	17	6	0	0	0	0	0	0	0	0	0	0	0	0	0	0
a	OTU 43 Candida parapsilosis	SH197714.07FU	dx.doi.org/10.15156/BIO/SH197714.07FU	0	78	0	3	50	67	3	0	0	0	0	79	0	34	13	0	109	0	8	0	0	0	0	0	0	0	0	0	0	0	0	0	0	0	0	0	1110	0	0	270	0	0	0
a	OTU 42 Candida tropicalis	SH201993.07FU	dx.doi.org/10.15156/BIO/SH201993.07FU	192	3937	3199	261	0	1613	1878	778	0	4	0	614	0	4117	3307	0	7452	26	6901	11	395	51	11600	26	16	3118	55	57	52	106	3278	0	36	0	0	0	0	0	0	0	0	0	0
a	OTU 48 Cladosporium	SH216250.07FU	dx.doi.org/10.15156/BIO/SH216250.07FU	0	0	0	0	0	3	0	0	0	0	0	0	0	0	0	0	0	0	0	0	0	0	0	0	0	0	8	0	0	34	0	0	0	0	0	0	0	0	0	0	0	0	0
a	OTU 13 Debaryomyces	SH190089.07FU	dx.doi.org/10.15156/BIO/SH190089.07FU	0	16	0	0	0	0	23	0	0	0	0	2	0	5	0	0	0	0	0	25	221	0	17	143	0	3	15	0	0	12	0	0	98	0	0	0	0	0	0	0	0	0	12
a	OTU 47 Didymellaceae	SH186597.07FU	dx.doi.org/10.15156/BIO/SH186597.07FU	0	26	0	0	0	0	14	5	0	0	0	0	61	29	0	0	0	0	0	20	189	0	0	0	0	0	0	0	0	0	0	0	18	0	0	0	75	0	0	0	0	0	55
a	OTU 6 Fusarium	SH220700.07FU	dx.doi.org/10.15156/BIO/SH220700.07FU	0	0	0	0	0	0	0	0	0	0	0	0	0	0	0	0	0	0	0	0	0	0	17	0	0	0	0	0	0	0	0	0	0	0	0	0	0	0	0	0	0	0	0
a	OTU 46 Glomerellaceae	SH206773.07FU	dx.doi.org/10.15156/BIO/SH206773.07FU	0	0	0	0	85	0	0	0	0	0	0	0	0	0	21	0	0	0	0	0	0	0	0	142	0	0	17	0	0	9	0	687	0	0	0	0	0	0	444	0	0	0	0
a	OTU 15 Nectria	SH175278.07FU	dx.doi.org/10.15156/BIO/SH175278.07FU	0	0	0	0	0	0	0	0	0	0	0	0	0	0	0	0	69	0	0	0	0	0	0	0	0	0	0	0	0	0	0	0	0	0	0	0	0	0	0	0	0	0	0
a	OTU 7 Ophiostoma	SH222205.07FU	dx.doi.org/10.15156/BIO/SH222205.07FU	0	0	0	0	0	0	0	0	0	0	0	0	0	0	0	0	0	0	0	0	0	0	0	0	0	0	0	0	0	0	0	0	0	0	0	0	0	0	0	56	0	0	0
a	OTU 2 Parengyodontium album	SH194042.07FU	dx.doi.org/10.15156/BIO/SH194042.07FU	0	1147	524	83	0	245	595	179	0	0	0	0	0	1111	586	0	0	0	0	0	0	0	0	0	0	0	0	0	0	0	0	0	0	0	0	0	0	0	0	0	0	0	0
a	OTU 24 Penicillium	SH207147.07FU	dx.doi.org/10.15156/BIO/SH207147.07FU	0	0	0	0	61	0	0	0	0	25	0	0	0	0	20	0	0	0	0	0	0	0	0	0	0	0	0	0	0	0	0	0	0	0	0	0	0	0	0	0	0	0	0
a	OTU 51 Penicillium	SH199401.07FU	dx.doi.org/10.15156/BIO/SH199401.07FU	0	0	0	0	0	0	0	0	0	0	0	0	0	0	0	0	0	0	0	0	0	10	0	0	0	0	0	0	0	0	0	0	0	0	0	0	0	0	0	190	0	898	0
a	OTU 8 Penicillium	SH207147.07FU	dx.doi.org/10.15156/BIO/SH207147.07FU	0	0	0	0	0	0	0	0	0	0	0	0	0	0	0	0	0	0	0	0	0	0	0	0	4	0	0	0	0	0	0	0	96	0	0	19	0	169	0	94	0	0	51
a	OTU 19 Penicillium	SH207151.07FU	dx.doi.org/10.15156/BIO/SH207151.07FU	0	0	0	0	0	0	0	0	0	0	0	0	0	0	0	0	0	0	0	0	0	0	0	8	0	0	0	0	0	0	0	0	0	0	0	0	0	0	0	0	0	0	0
a	OTU 28 Penicillium	SH207147.07FU	dx.doi.org/10.15156/BIO/SH207147.07FU	0	30	0	0	0	0	0	0	0	0	54	0	6	0	0	0	0	0	0	0	0	0	0	0	0	0	0	0	0	0	0	0	0	0	0	597	0	0	0	0	0	0	0
a	OTU 49 Penicillium brevicompactum	SH199400.07FU	dx.doi.org/10.15156/BIO/SH199400.07FU	0	0	0	0	34	0	7	0	0	0	0	0	0	0	7	0	0	0	0	0	0	0	0	24	0	0	0	0	0	3	0	0	754	0	0	20	86	144	0	0	0	0	13
a	OTU 9 Pichia	SH204042.07FU	dx.doi.org/10.15156/BIO/SH204042.07FU	0	0	0	0	0	0	0	0	0	0	0	0	0	0	0	0	0	0	0	0	0	0	0	0	0	0	0	0	0	0	0	0	0	0	0	59	0	0	0	1518	0	55	0
a	OTU 16 Pleosporaceae	SH216783.07FU	dx.doi.org/10.15156/BIO/SH216783.07FU	0	54	54	0	7	0	6	0	0	0	0	0	0	15	23	0	0	0	0	5	39	0	0	0	0	0	0	0	0	0	0	288	0	0	0	0	0	0	0	0	0	0	0
a	OTU 10 Saccharomyces cerevisiae	SH181234.07FU	dx.doi.org/10.15156/BIO/SH181234.07FU	0	0	0	0	0	0	0	0	0	0	0	0	0	0	0	0	0	0	0	0	0	16	0	0	0	0	0	0	0	0	0	0	0	0	0	0	0	0	0	0	0	0	0
a	OTU 4 Candida tropicalis	SH201993.07FU	dx.doi.org/10.15156/BIO/SH201993.07FU	0	0	0	0	0	0	0	0	0	0	0	0	0	6	0	0	0	0	0	0	0	0	0	0	0	0	0	0	0	0	0	0	0	0	0	1386	0	0	0	0	0	0	880
a	OTU 29 Sarocladium strictum	SH210203.07FU	dx.doi.org/10.15156/BIO/SH210203.07FU	0	0	0	0	0	0	0	0	0	0	0	0	0	0	0	0	0	0	0	0	0	0	0	14	0	0	0	0	0	0	0	0	0	0	0	0	0	0	0	0	0	0	0
b	OTU 30 Auricularia auricula-judae	SH194580.07FU	dx.doi.org/10.15156/BIO/SH194580.07FU	0	0	0	0	0	0	0	0	0	0	0	0	0	0	0	0	0	0	0	0	0	0	0	0	0	0	0	0	3	0	0	0	0	0	0	0	0	0	0	0	0	0	0
b	OTU 33 Crepidotus subverrucisporus	SH031122.07FU	dx.doi.org/10.15156/BIO/SH031122.07FU	201	0	0	0	0	0	0	0	0	0	0	0	0	0	0	0	0	0	0	0	0	0	0	0	0	0	0	0	0	0	0	0	0	0	0	0	0	0	0	0	0	0	0
b	OTU 50 Filobasidium magnum	SH197623.07FU	dx.doi.org/10.15156/BIO/SH197623.07FU	0	0	0	0	0	0	0	2	0	115	0	0	0	0	0	0	0	0	0	0	0	0	0	0	0	0	0	0	0	0	0	0	0	0	0	0	0	0	0	0	0	0	0
b	OTU 39 Dioszegia hungarica	SH182099.07FU	dx.doi.org/10.15156/BIO/SH182099.07FU	0	45	18	0	36	4	5	0	0	0	0	0	0	8	16	0	0	0	0	0	0	0	0	0	0	0	0	0	0	0	0	0	0	0	0	0	0	0	1718	0	0	0	0
b	OTU 20 Erythrobasidium	SH194739.07FU	dx.doi.org/10.15156/BIO/SH194739.07FU	0	0	0	0	0	0	19	0	0	0	0	0	0	0	0	0	0	0	0	0	0	0	0	0	0	0	0	0	0	0	0	0	0	0	0	0	0	0	0	0	0	0	0
b	OTU 41 Hyphodermella rosae	SH187526.07FU	dx.doi.org/10.15156/BIO/SH187526.07FU	0	0	0	0	46	46	0	0	0	0	0	0	0	9	10	0	0	0	0	0	0	0	0	0	0	0	0	0	0	0	0	0	0	0	0	32	0	0	0	0	0	0	75
b	OTU 35 Microbotryum tragopogonis-pratensis	SH186559.07FU	dx.doi.org/10.15156/BIO/SH186559.07FU	0	0	0	0	0	0	0	0	0	0	0	0	0	0	0	0	7	6194	5	0	0	0	0	0	0	0	0	0	0	0	0	0	0	0	0	0	0	0	0	0	0	0	0
b	OTU 40 Peniophoraceae	SH188978.07FU	dx.doi.org/10.15156/BIO/SH188978.07FU	0	0	0	0	0	0	0	0	0	0	0	0	0	0	0	0	0	0	0	0	0	0	0	0	0	0	0	2	6	0	0	0	0	0	0	0	0	0	0	0	0	0	0
b	OTU 32 Rhodosporidiobolus colostri	SH532435.07FU	dx.doi.org/10.15156/BIO/SH532435.07FU	0	0	0	4	34	0	55	0	0	0	0	0	0	0	23	0	0	0	0	0	0	0	0	0	0	0	0	0	0	0	0	0	0	0	0	0	0	0	0	0	0	0	0
b	OTU 36 Rhodotorula	Not avaliable	Not avaliable	0	0	0	0	0	0	0	0	0	0	0	0	0	0	0	0	0	0	0	0	0	0	0	0	0	0	0	0	0	0	0	0	0	0	0	0	0	57	0	0	0	252	0
b	OTU 45 Rhodotorula mucilaginosa	SH216361.07FU	dx.doi.org/10.15156/BIO/SH216361.07FU	0	0	13	0	0	67	0	2	0	0	0	0	0	19	4	0	0	0	0	0	0	0	0	0	0	0	8	0	0	27	0	24	0	0	0	0	85	0	0	0	0	0	42
b	OTU 38 Sporidiobolus salmonicolor	SH194974.07FU	dx.doi.org/10.15156/BIO/SH194974.07FU	0	0	0	0	0	0	0	0	0	0	0	0	0	0	0	0	0	0	0	0	0	0	0	73	0	0	15	0	0	2	0	0	86	0	0	0	0	0	26	0	0	0	0
b	OTU 31 Tremellales	SH629451.07FU	Not avaliable	0	0	0	0	0	0	0	0	0	0	0	0	0	0	0	0	0	0	0	0	0	0	0	0	0	0	0	0	0	0	0	0	0	0	0	0	0	0	98	0	0	0	0
b	OTU 44 Wallemia	SH216453.07FU	dx.doi.org/10.15156/BIO/SH216453.07FU	0	0	2	15	0	0	163	0	0	0	0	0	0	0	0	0	5	0	0	144	323	1363	146	131	0	19	0	0	0	14	3	0	0	0	0	0	0	0	0	0	0	44	0
b	OTU 37 Wallemia muriae	SH216454.07FU	dx.doi.org/10.15156/BIO/SH216454.07FU	0	0	0	0	0	0	0	0	0	0	0	0	0	0	0	0	0	0	0	0	0	0	0	0	0	0	0	0	0	0	0	0	45	0	0	99	47	0	0	0	49	231	0
c	OTU 27 Chytridiomycota	SH532292.07FU	dx.doi.org/10.15156/BIO/SH532292.07FU	0	0	0	0	0	0	0	0	0	0	0	0	0	0	0	0	0	0	0	0	0	0	0	0	0	0	0	0	0	0	0	0	0	0	0	0	99	0	0	0	0	0	0
u	OTU 12 Fungi	SH212842.07FU	dx.doi.org/10.15156/BIO/SH212842.07FU	0	0	47	14	0	443	141	31	0	36	0	0	0	213	17	11	0	0	0	52	525	0	4	174	0	0	19	10	12	11	0	67	89	0	0	79	711	2958	0	75	0	0	72
a	OTU 25 Acremonium	SH202931.07FU	dx.doi.org/10.15156/BIO/SH202931.07FU	0	0	0	0	0	0	0	0	0	0	0	0	0	0	0	0	0	0	0	0	0	0	0	19	0	0	2	0	0	2	0	0	0	0	0	0	97	0	0	0	0	0	0
b	OTU 34 Malasseziales	SH214135.07FU	dx.doi.org/10.15156/BIO/SH214135.07FU	0	0	0	0	0	0	0	0	0	0	0	4	0	0	0	0	0	0	0	0	0	0	0	0	0	0	0	0	0	0	8	0	0	0	0	0	0	0	0	0	0	0	0
Total OTU/sample				3	11	10	9	11	10	15	9	1	4	1	4	4	14	16	5	5	2	3	8	8	6	6	10	4	4	9	5	6	11	4	8	14	1	4	12	10	6	4	10	2	8	10
ITS2
Taxa	OTU	SH code	DOI code	P1	P2	P3	P4	P5	P6	P7	P8	P9	P10	P11	P12	P13	P14	P15	P16	P17	P18	P19	P20	P21	P22	P23	P24	P25	P26	P27	P28	P29	P30	P31	C1	C2	C3	C4	C5	C6	C7	C8	C9	C10	C11	C12
a	OTU 24 Xylariales			0	0	0	0	0	0	0	0	0	0	0	0	0	0	0	0	0	0	0	0	52	0	0	0	0	0	0	0	0	0	0	0	0	0	0	0	0	0	0	0	0	0	0
a	OTU 13 Alternaria	SH019712.07FU	dx.doi.org/10.15156/BIO/SH019712.07FU	0	0	0	0	0	0	0	0	0	0	0	0	0	0	0	0	0	0	0	0	0	0	0	0	0	0	0	0	0	0	0	0	0	0	0	0	846	0	247	855	0	21	429
a	OTU 15 Alternaria	SH216785.07FU	dx.doi.org/10.15156/BIO/SH216785.07FU	4	19	0	0	0	29	12	41	0	101	0	0	0	6	0	0	22	28	0	9	21	17	48	51	9	0	0	23	3	0	26	323	0	32	0	0	14	0	1634	25	0	16	0
a	OTU 20 Candida parapsilosis	SH180865.07FU	dx.doi.org/10.15156/BIO/SH180865.07FU	0	3	13	0	0	6	8	0	0	0	0	0	0	6	12	0	0	0	0	0	0	0	0	0	0	0	0	0	0	0	0	0	0	0	32	0	0	0	459	0	0	0	0
a	OTU 42 Candida tropicalis	SH201993.07FU	dx.doi.org/10.15156/BIO/SH201993.07FU	0	147	478	0	0	376	317	294	0	0	0	0	0	238	369	0	145	64	4865	7031	0	0	20	131	6	3479	0	4	0	0	3407	1244	0	0	0	0	0	0	0	0	0	0	0
a	OTU 44 Candida parapsilosis	SH197714.07FU	dx.doi.org/10.15156/BIO/SH197714.07FU	0	0	20	0	0	22	0	0	0	0	0	0	0	0	4	0	0	0	0	0	0	0	0	0	0	0	3	0	0	17	0	22	0	44	0	0	0	0	0	0	0	0	0
a	OTU 1 Candida albicans	SH631563.07FU	Not avaliable	0	102	289	3093	1644	191	152	171	0	0	0	0	0	149	216	4110	0	0	0	0	1169	782	0	0	0	50	9	3	3053	65	50	0	0	0	72	0	0	0	0	0	0	0	0
a	OTU 47 Candida tropicalis	SH201993.07FU	dx.doi.org/10.15156/BIO/SH201993.07FU	0	0	2	0	0	0	0	0	0	0	0	0	0	0	0	0	0	0	0	0	0	0	0	0	0	0	0	0	0	0	0	0	0	0	0	0	0	0	0	0	0	0	0
a	OTU 29 Capnodiales	SH216250.07FU	dx.doi.org/10.15156/BIO/SH216250.07FU	7	0	0	0	0	0	0	0	0	0	0	0	0	0	0	0	0	0	0	0	29	19	0	0	0	0	0	0	0	0	0	0	0	0	0	0	0	0	0	0	0	0	14
a	OTU 6 Cladosporium	SH216250.07FU	dx.doi.org/10.15156/BIO/SH216250.07FU	0	0	0	0	0	0	11	3	0	0	0	56	0	0	0	0	807	800	0	0	0	0	830	1733	0	0	0	0	0	0	0	0	0	0	0	0	0	0	0	0	0	0	0
a	OTU 50 Davidiella	SH176536.07FU	dx.doi.org/10.15156/BIO/SH176536.07FU	0	0	0	0	0	0	0	0	0	0	0	0	0	0	0	0	0	0	0	0	0	0	0	0	0	0	0	0	0	0	0	0	0	0	0	0	0	466	0	0	0	0	0
a	OTU 7 Debaryomyces	SH190089.07FU	dx.doi.org/10.15156/BIO/SH190089.07FU	0	0	0	0	0	0	0	0	0	0	0	87	0	0	0	0	8	9	0	0	0	0	7	22	0	3	0	0	0	0	21	0	0	0	0	0	0	0	0	0	1689	0	0
a	OTU 8 Dipodascaceae	Not avaliable	Not avaliable	0	0	0	0	0	0	0	0	0	0	0	0	0	0	0	0	0	0	0	0	0	0	0	0	0	0	0	0	0	0	0	0	0	0	0	0	25	0	0	0	0	0	0
a	OTU 9 Dipodascaceae	Not avaliable	Not avaliable	0	0	0	0	0	0	0	0	0	0	0	0	0	0	0	0	0	0	0	0	0	0	0	0	0	0	0	0	0	0	0	0	0	0	0	0	175	0	0	72	0	0	0
a	OTU 10 Dipodascaceae	SH180671.07FU	dx.doi.org/10.15156/BIO/SH180671.07FU	0	0	0	0	0	0	0	0	0	0	0	0	0	0	0	0	0	0	0	0	0	0	0	0	0	0	167	0	0	0	0	0	0	0	0	0	0	0	0	0	37	0	0
a	OTU 26 Dothideomycetes	SH182914.07FU	dx.doi.org/10.15156/BIO/SH182914.07FU	0	0	0	0	0	0	0	0	0	0	0	1560	0	0	0	0	0	0	0	0	0	0	0	0	0	0	0	0	0	0	0	0	0	0	1924	0	0	0	0	0	0	0	0
a	OTU 11 Erysiphe platani	SH187447.07FU	dx.doi.org/10.15156/BIO/SH187447.07FU	0	0	0	0	0	0	0	0	0	0	0	0	0	0	0	0	0	6	0	0	0	0	0	10	0	0	0	0	0	0	0	0	0	0	0	608	0	0	0	0	0	0	0
a	OTU 18 Penicillium	SH207151.07FU	dx.doi.org/10.15156/BIO/SH207151.07FU	0	0	0	0	0	0	0	0	0	0	0	0	0	0	0	0	0	0	0	0	0	0	0	0	0	0	0	0	0	5	0	0	0	0	0	0	0	0	0	0	0	0	0
a	OTU 27 Eurotiales	SH198028.07FU	dx.doi.org/10.15156/BIO/SH198028.07FU	5	0	0	0	0	0	0	0	0	0	0	0	0	0	0	0	0	0	0	0	0	0	0	0	0	0	0	0	0	0	0	0	0	29	0	0	0	0	0	0	0	0	0
a	OTU 30 Penicillium	SH207147.07FU	dx.doi.org/10.15156/BIO/SH207147.07FU	0	0	0	0	0	0	0	0	0	0	0	139	0	0	0	0	0	0	0	0	0	0	0	0	0	0	0	0	16	0	0	0	0	0	0	0	0	0	0	0	0	0	0
a	OTU 28 Parengyodontium album	SH194042.07FU	dx.doi.org/10.15156/BIO/SH194042.07FU	0	25	43	0	0	18	43	46	0	0	0	0	0	52	35	0	0	0	0	0	0	0	0	0	0	0	0	0	0	0	0	0	0	0	0	0	0	0	0	0	0	0	0
a	OTU 3 Penicillium	SH207152.07FU	dx.doi.org/10.15156/BIO/SH207152.07FU	0	0	0	0	0	0	0	0	0	22	0	0	0	0	0	0	0	7	0	0	57	0	0	3	8	0	0	19	0	3	0	0	0	0	0	0	0	0	0	0	0	0	0
a	OTU 25 Penicillium chrysogenum	SH001394.07FU	dx.doi.org/10.15156/BIO/SH001394.07FU	0	0	0	0	0	0	0	0	0	0	0	0	0	0	0	0	0	0	0	0	0	0	0	0	0	0	0	0	0	0	0	0	0	0	0	117	0	0	0	0	0	0	0
a	OTU 4 Pichia	SH521670.07FU	Not avaliable	0	0	9	0	0	3	0	0	0	0	0	0	0	0	3	0	0	0	0	0	0	0	0	0	0	0	0	0	0	0	0	253	0	0	0	0	0	0	0	0	0	0	0
a	OTU 35 Alternaria	SH216784.07FU	dx.doi.org/10.15156/BIO/SH216784.07FU	0	0	0	0	0	0	0	0	0	0	0	43	0	0	0	0	0	0	0	0	0	0	0	0	0	0	0	0	0	0	0	0	0	0	0	0	0	0	0	0	0	0	0
a	OTU 14 Alternaria	SH025059.07FU	dx.doi.org/10.15156/BIO/SH025059.07FU	0	0	0	0	0	0	0	0	0	0	0	0	0	0	0	0	0	0	0	0	0	0	0	0	0	0	0	0	0	0	0	0	0	0	0	163	0	0	0	0	0	8	0
a	OTU 12 Pleospora	SH011827.07FU	dx.doi.org/10.15156/BIO/SH011827.07FU	0	0	0	0	0	0	0	0	0	0	0	0	0	0	0	0	0	0	0	0	0	0	0	0	0	0	0	0	0	0	0	0	0	0	0	0	972	0	143	26	0	0	0
a	OTU 16 Alternaria	SH216783.07FU	dx.doi.org/10.15156/BIO/SH216783.07FU	0	0	0	0	0	0	0	0	0	0	0	0	0	0	0	0	43	11	0	0	0	0	0	20	0	0	0	0	0	0	0	0	80	0	0	87	0	0	0	0	0	0	0
a	OTU 17 Pleosporaceae	SH216784.07FU	dx.doi.org/10.15156/BIO/SH216784.07FU	0	0	0	0	0	0	0	0	0	0	0	61	0	0	0	0	0	0	0	0	0	0	0	0	0	0	0	0	0	0	0	0	0	0	0	0	0	0	0	0	0	0	0
a	OTU 5 Saccharomyces cerevisiae	SH181234.07FU	dx.doi.org/10.15156/BIO/SH181234.07FU	0	0	0	0	0	0	0	0	0	0	0	0	0	0	0	0	0	0	0	0	0	0	0	2	0	0	0	3	0	0	0	0	0	0	0	0	0	0	0	0	0	0	0
a	OTU 22 Saccharomyces cerevisiae	Not avaliable	Not avaliable	0	0	0	0	0	0	0	0	0	0	0	0	0	0	0	0	0	0	0	0	533	331	0	0	0	0	0	0	17	0	0	0	1310	0	0	0	0	0	0	0	0	588	0
a	OTU 46 Meyerozyma guilliermondii	SH192552.07FU	dx.doi.org/10.15156/BIO/SH192552.07FU	0	0	0	0	0	0	7	0	0	0	0	0	0	0	0	0	0	0	0	0	0	0	0	0	0	0	0	0	0	0	0	15	0	0	0	0	0	0	0	0	35	0	693
a	OTU 19 Nakaseomyces	SH183656.07FU	dx.doi.org/10.15156/BIO/SH183656.07FU	0	576	1699	0	0	1443	1058	1243	0	0	4988	0	0	1031	1462	0	0	0	0	0	0	0	0	0	119	781	0	127	0	0	721	728	0	0	74	199	67	0	0	0	0	585	0
a	OTU 21 Issatchenkia orientalis	SH181823.07FU	dx.doi.org/10.15156/BIO/SH181823.07FU	0	0	0	0	0	0	0	0	0	0	0	0	0	0	0	0	0	0	0	0	16	14	0	0	2388	0	0	1102	0	0	0	0	28	0	0	0	0	0	23	0	1213	0	0
a	OTU 23 Sordariales	SH215226.07FU	dx.doi.org/10.15156/BIO/SH215226.07FU	0	0	0	0	0	0	0	0	0	0	0	0	0	0	0	0	0	13	0	0	0	0	0	10	0	0	0	0	0	0	0	0	0	0	0	99	0	0	0	0	0	0	0
b	OTU 37 Gjaerumia minor	SH192687.07FU	dx.doi.org/10.15156/BIO/SH192687.07FU	0	0	0	0	0	0	0	0	0	0	0	0	0	0	0	0	0	0	0	0	5	4	0	0	0	0	0	0	0	0	0	0	0	0	0	0	0	0	0	0	0	0	0
b	OTU 40 Hyphodermella	SH187526.07FU	dx.doi.org/10.15156/BIO/SH187526.07FU	0	0	0	0	0	0	0	0	0	0	0	0	0	0	0	0	0	0	2	0	0	0	0	0	0	0	0	0	0	0	0	0	0	0	0	0	0	0	0	0	0	80	0
b	OTU 38 Hyphodontia radula	SH221533.07FU	dx.doi.org/10.15156/BIO/SH221533.07FU	0	0	0	0	0	0	0	0	0	0	0	0	0	0	0	0	0	0	0	0	0	0	0	0	0	3	0	0	0	0	15	0	0	0	0	0	0	0	0	0	0	0	0
b	OTU 31 Itersonilia perplexans	SH199072.07FU	dx.doi.org/10.15156/BIO/SH199072.07FU	0	0	0	0	0	0	0	0	0	0	0	0	0	0	0	0	0	0	0	0	35	0	0	0	0	0	0	0	0	0	0	0	0	0	0	0	0	0	0	0	0	0	0
b	OTU 45 Malassezia restricta	SH176394.07FU	dx.doi.org/10.15156/BIO/SH176394.07FU	0	0	0	0	0	0	0	0	45	0	0	0	0	0	0	0	0	0	0	0	0	0	0	0	0	0	0	0	0	0	6	24	0	0	0	0	0	0	0	0	0	0	0
b	OTU 52 Malassezia	SH176395.07FU	dx.doi.org/10.15156/BIO/SH176394.07FU	0	0	0	0	0	0	0	0	0	0	0	0	0	0	0	0	0	0	0	0	102	0	0	0	0	0	0	0	0	0	0	0	0	0	0	378	0	0	0	0	0	0	0
b	OTU 33 Malassezia sympodialis	SH188402.07FU	dx.doi.org/10.15156/BIO/SH188402.07FU	0	0	0	0	0	0	0	0	0	0	0	0	0	0	0	0	0	0	0	0	14	0	0	0	0	0	0	0	0	0	0	0	0	0	0	0	0	0	0	0	0	0	0
b	OTU 32 Malasseziales	SH214135.07FU	dx.doi.org/10.15156/BIO/SH214135.07FU	0	0	0	0	0	0	0	0	0	66	0	0	0	0	0	5	0	0	0	0	24	10	0	0	0	0	0	0	0	0	0	0	0	0	0	0	0	0	0	0	0	0	0
b	OTU 34 Peniophoraceae	SH188970.07FU	dx.doi.org/10.15156/BIO/SH188970.07FU	0	0	0	2	0	0	0	0	0	0	0	0	0	0	0	0	0	0	0	0	0	0	0	0	0	0	0	0	0	0	0	0	0	0	0	0	0	0	0	0	0	0	0
b	OTU 39 Trametes versicolor	SH193318.07FU	dx.doi.org/10.15156/BIO/SH193318.07FU	0	0	0	0	0	0	0	0	0	0	0	0	0	0	0	0	0	0	0	0	8	0	0	0	0	0	0	0	0	0	0	0	0	0	0	0	0	0	0	0	0	0	0
b	OTU 36 Rhodotorula mucilaginosa	SH216361.07FU	dx.doi.org/10.15156/BIO/SH216361.07FU	0	0	0	0	0	0	0	7	0	0	0	0	0	3	0	0	0	0	0	0	0	0	0	0	0	0	0	0	0	0	0	0	0	0	0	0	0	0	0	0	0	0	0
b	OTU 41 Tremellales	Not avaliable	Not avaliable	0	0	0	5	5	0	0	0	0	0	0	0	0	0	0	2	0	0	0	0	0	0	0	0	0	0	0	0	0	0	0	0	0	0	0	0	0	0	0	0	0	160	0
b	OTU 51 Tremellales	SH181632.07FU	dx.doi.org/10.15156/BIO/SH181632.07FU	0	0	0	0	0	0	0	0	0	0	0	0	0	0	0	0	0	0	0	0	0	0	0	0	0	0	0	0	0	0	0	0	0	0	0	0	0	0	0	0	22	0	0
u	OTU 48 Plectosphaerella	SH190975.07FU	dx.doi.org/10.15156/BIO/SH190975.07FU	0	0	0	0	0	0	0	0	0	0	0	0	0	0	0	0	2	0	0	0	0	0	14	4	0	0	0	0	0	0	0	0	0	0	716	41	0	0	0	0	0	0	654
u	OTU 49 Fungi	SH533811.07FU	dx.doi.org/10.15156/BIO/SH533811.07FU	0	0	0	0	0	0	0	0	0	0	0	0	0	0	0	0	0	0	0	0	0	0	0	0	0	0	0	0	0	0	0	0	0	0	0	0	0	408	0	0	0	0	0
u	OTU 53 Fungi	SH528805.07FU	dx.doi.org/10.15156/BIO/SH528805.07FU	0	0	0	0	0	0	0	0	0	0	0	0	31	0	0	0	0	0	0	0	0	0	0	0	0	0	0	0	0	0	0	0	0	0	0	70	0	0	0	0	0	0	0
u	OTU 2 Fungi	Not avaliable	Not avaliable	0	0	0	0	0	0	0	0	0	0	0	42	0	0	0	0	0	0	0	0	22	19	0	0	0	0	0	0	0	0	0	0	0	0	0	0	0	0	0	0	0	0	0
u	OTU 43 Fungi	SH197623.07FU	dx.doi.org/10.15156/BIO/SH197623.07FU	0	0	0	0	6	0	0	0	0	53	0	16	0	0	0	5	0	0	0	0	0	0	0	0	0	0	0	9	0	0	0	0	9	0	0	0	0	0	0	0	0	0	0
Total OTU/sample				3	6	8	3	3	8	8	7	1	4	1	8	1	7	7	4	6	8	2	2	14	8	5	10	5	5	3	8	4	4	7	7	4	3	5	9	6	2	5	4	5	7	4
DOI	Digital Object identifiers
SH	Species Hypotheses
a	Ascomycota
b	Basisiomycota
c	Chytridiomycota
u	Unidentified fungi
